# Supplementary material for: Offspring reaction norms shaped by parental environment: interaction between within- and trans-generational plasticity of inducible defenses
Source: BMC Evol Biol. 2016 Oct 12;16:209. doi: 10.1186/s12862-016-0795-9 (PMC5062831; doi:10.1186/s12862-016-0795-9)
Supplement: Additional file 5: — Raw dataset used in this study. (XLSX 37 kb) [file 12862_2016_795_MOESM5_ESM.xlsx]

## Sheet: data_dryad_bmcevolbiol
Parental_env	Offspring_env	Family	Individuals	Thickness	Weight	Shell_length	Shel_width	Aperture_length	Aperture_width	log(weight)	Median_weight
C	C	M36	3	0.01	0.0043	3.245	1.791	2.388	0.939	-5.44914	M1
C	C	M11	2	0.02	0.0045	3.371	1.903	2.477	1.057	-5.40368	M1
C	C	M15	1	0.03	0.0047	3.405	1.96	2.569	0.957	-5.36019	M1
C	C	M42	6	0.03	0.006	3.868	2.203	2.818	1.071	-5.116	M1
C	C	M15	4	0.02	0.0067	3.876	2.064	2.792	1.155	-5.00565	M1
C	C	M11	1	0.02	0.0068	3.97	2.166	2.814	1.133	-4.99083	M1
C	C	M15	5	0.01	0.0074	4.212	2.147	2.917	1.125	-4.90628	M1
C	C	M42	5	0.03	0.0076	4.249	2.469	2.906	1.19	-4.87961	M1
C	C	M35	1	0.05	0.0089	4.173	2.273	3.092	1.22	-4.7217	M1
C	C	M35	8	0.02	0.009	4.397	2.376	2.96	1.228	-4.71053	M1
C	C	M35	7	0.04	0.0092	4.452	2.348	3.157	1.368	-4.68855	M1
C	C	M36	2	0.05	0.0101	4.547	2.419	3.05	1.252	-4.59522	M1
C	C	M43	6	0.09	0.0104	4.517	2.812	3.403	1.326	-4.56595	M1
C	C	M36	1	0.03	0.0106	4.614	2.528	3.153	1.405	-4.5469	M1
C	C	M35	6	0.05	0.011	4.703	2.546	3.512	1.45	-4.50986	M1
C	C	M42	3	0.04	0.0116	4.905	2.736	3.462	1.404	-4.45675	M1
C	C	M12	5	0.02	0.0117	4.959	2.49	3.061	1.114	-4.44817	M1
C	C	M42	2	0.05	0.0119	4.969	2.842	3.485	1.365	-4.43122	M1
C	C	M13	3	0.03	0.0125	4.848	2.765	3.352	1.392	-4.38203	M1
C	C	M44	6	0.04	0.0126	4.874	2.86	3.769	1.648	-4.37406	M1
C	C	M35	2	0.09	0.0127	4.858	2.627	3.313	1.418	-4.36615	M1
C	C	M4	5	0.06	0.0128	4.789	2.66	3.392	1.468	-4.35831	M1
C	C	M36	5	0.05	0.0133	4.791	2.718	3.386	1.35	-4.31999	M1
C	C	M12	6	0.03	0.0144	5.253	2.703	3.477	1.399	-4.24053	M1
C	C	M12	3	0.05	0.0146	5.254	2.837	3.544	1.463	-4.22673	M1
C	C	M13	2	0.06	0.0149	5.222	2.768	3.574	1.452	-4.20639	M1
C	C	M13	6	0.1	0.0149	5.018	2.71	3.602	1.341	-4.20639	M1
C	C	M35	3	0.05	0.0152	4.99	2.951	3.553	1.499	-4.18646	M2
C	C	M12	2	0.05	0.016	5.332	2.714	3.433	1.461	-4.13517	M2
C	C	M12	4	0.07	0.0163	5.33	2.862	3.558	1.378	-4.11659	M2
C	C	M1	6	0.07	0.0167	5.483	2.872	3.766	1.555	-4.09235	M2
C	C	M40	1	0.06	0.0175	5.533	2.971	3.697	1.406	-4.04555	M2
C	C	M44	1	0.04	0.0175	5.518	3.263	4.036	1.647	-4.04555	M2
C	C	M42	4	0.04	0.0177	5.686	3.076	3.933	1.517	-4.03419	M2
C	C	M43	5	0.05	0.0181	5.857	3.085	4.112	1.631	-4.01184	M2
C	C	M4	2	0.08	0.0182	5.566	3.136	3.755	1.503	-4.00633	M2
C	C	M40	2	0.06	0.0185	5.852	2.882	3.333	1.358	-3.98998	M2
C	C	M4	6	0.03	0.0191	5.569	3.207	3.868	1.704	-3.95807	M2
C	C	M40	3	0.04	0.0191	5.647	2.94	3.715	1.83	-3.95807	M2
C	C	M8	2	0.03	0.0191	5.647	3.219	3.909	1.647	-3.95807	M2
C	C	M39	4	0.06	0.0194	5.902	3.265	4.157	1.709	-3.94248	M2
C	C	M1	2	0.05	0.0196	5.804	3.174	3.984	1.68	-3.93223	M2
C	C	M39	5	0.05	0.0199	5.963	3.254	4.17	1.68	-3.91704	M2
C	C	M1	1	0.07	0.02	5.438	3.149	3.738	1.506	-3.91202	M2
C	C	M39	3	0.1	0.0205	5.746	3.3	4.113	1.735	-3.88733	M2
C	C	M39	2	0.05	0.0206	5.835	3.254	4.13	1.701	-3.88246	M2
C	C	M39	1	0.05	0.0209	6.203	3.337	4.405	1.632	-3.86801	M2
C	C	M36	4	0.08	0.0211	5.72	3.233	3.972	1.522	-3.85848	M2
C	C	M41	4	0.04	0.0211	6.173	3.283	4.127	1.749	-3.85848	M2
C	C	M8	5	0.09	0.0213	5.665	3.091	3.737	1.393	-3.84905	M2
C	C	M4	4	0.03	0.0218	5.977	3.214	4.096	1.706	-3.82585	M2
C	C	M8	4	0.05	0.0222	5.985	3.144	4.079	1.613	-3.80766	M2
C	C	M13	1	0.05	0.023	5.876	3.433	4.329	1.818	-3.77226	M2
C	C	M5	5	0.04	0.0234	6.362	3.338	4.137	1.809	-3.75502	M2
C	C	M43	3	0.07	0.0236	6.109	3.396	4.377	1.533	-3.74651	M2
C	C	M38	2	0.03	0.0238	5.95	3.298	4.214	1.595	-3.73807	M2
C	C	M37	5	0.04	0.0239	6.447	3.482	4.299	1.919	-3.73388	M2
C	C	M4	3	0.08	0.0241	5.844	3.495	4.189	1.874	-3.72554	M2
C	C	M13	5	0.12	0.0243	5.902	3.157	4.129	1.583	-3.71728	M2
C	C	M35	5	0.04	0.0244	6.313	3.512	4.44	2.071	-3.71317	M2
C	C	M38	5	0.05	0.0246	5.916	3.331	4.003	1.712	-3.70501	M2
C	C	M44	3	0.04	0.0248	6.483	3.404	4.202	1.589	-3.69691	M2
C	C	M1	4	0.07	0.0249	6.019	3.267	4.17	1.887	-3.69289	M2
C	C	M35	4	0.03	0.025	6.33	3.325	4.206	1.724	-3.68888	M2
C	C	M43	2	0.04	0.0253	6.433	3.643	4.438	1.788	-3.67695	M2
C	C	M42	1	0.04	0.0254	6.657	3.568	4.432	1.874	-3.67301	M2
C	C	M41	2	0.03	0.0255	6.407	3.602	4.413	1.931	-3.66908	M2
C	C	M38	6	0.03	0.0256	6.249	3.56	4.319	1.719	-3.66516	M2
C	C	M44	2	0.05	0.0266	6.55	3.596	4.349	1.477	-3.62684	M2
C	C	M38	3	0.07	0.0268	6.329	3.63	4.392	1.794	-3.61935	M2
C	C	M37	6	0.05	0.0284	6.55	3.723	4.265	1.766	-3.56137	M2
C	C	M14	2	0.11	0.0286	6.914	3.664	4.515	1.966	-3.55435	M2
C	C	M41	5	0.04	0.029	6.888	3.7	4.489	2.008	-3.54046	M2
C	C	M5	4	0.13	0.0292	6.29	3.48	4.46	1.781	-3.53359	M2
C	C	M41	6	0.05	0.0295	6.969	3.601	4.419	2.086	-3.52337	M2
C	C	M43	1	0.08	0.0298	6.389	3.605	4.273	1.674	-3.51325	M2
C	C	M36	6	0.05	0.0301	6.701	3.685	4.474	1.999	-3.50323	M2
C	C	M37	3	0.06	0.0303	6.908	3.869	4.921	1.962	-3.49661	M2
C	C	M37	4	0.04	0.0303	7.044	3.831	4.702	1.974	-3.49661	M2
C	C	M14	1	0.13	0.0304	6.64	3.474	4.408	1.948	-3.49331	M2
C	C	M14	3	0.13	0.0306	6.976	3.405	4.405	1.674	-3.48676	M2
C	C	M43	4	0.006	0.0307	7.007	3.824	4.834	1.875	-3.48349	M2
C	C	M37	2	0.04	0.0327	7.141	3.748	4.728	1.89	-3.42038	M2
C	C	M5	3	0.14	0.0331	6.62	3.507	4.039	1.633	-3.40822	M2
C	C	M5	2	0.14	0.034	6.401	3.764	4.68	1.833	-3.38139	M2
C	C	M37	1	0.05	0.0354	7.012	4.021	4.995	1.954	-3.34104	M2
C	C	M44	5	0.04	0.0368	7.088	3.742	4.68	1.945	-3.30226	M2
C	C	M41	3	0.05	0.0374	7.525	4.043	4.887	1.981	-3.28608	M2
C	C	M5	1	0.09	0.0381	7.271	3.84	4.79	2.002	-3.26754	M2
C	C	M44	4	0.06	0.0411	7.324	4.23	5.087	2.21	-3.19175	M2
C	C	M41	1	0.04	0.0461	7.967	4.283	5.204	2.048	-3.07694	M2
C	P	M40	3	0.09	0.0025	2.596	1.514	1.821	0.801	-5.99146	M1
C	P	M12	6	0.08	0.0036	2.86	1.518	1.851	0.768	-5.62682	M1
C	P	M12	2	0.11	0.0041	3.339	1.756	2.226	0.895	-5.49677	M1
C	P	M35	5	0.03	0.0042	3.341	1.87	2.355	1.02	-5.47267	M1
C	P	M40	4	0.02	0.0049	3.267	1.838	2.432	0.924	-5.31852	M1
C	P	M35	3	0.1	0.0051	3.356	1.922	2.405	1.043	-5.27851	M1
C	P	M1	6	0.11	0.0056	3.83	2.003	2.518	1.037	-5.18499	M1
C	P	M15	3	0.09	0.0056	3.796	2.041	2.708	1.031	-5.18499	M1
C	P	M15	5	0.1	0.0056	3.709	1.939	2.481	0.943	-5.18499	M1
C	P	M15	6	0.09	0.006	3.736	1.953	2.487	0.98	-5.116	M1
C	P	M13	4	0.05	0.0062	3.609	2.1	2.627	1.132	-5.08321	M1
C	P	M38	5	0.02	0.0063	4.007	2.037	2.792	1.006	-5.06721	M1
C	P	M40	5	0.03	0.0067	4.105	2.143	2.793	1.042	-5.00565	M1
C	P	M43	3	0.12	0.0068	4.079	2.191	2.779	1.011	-4.99083	M1
C	P	M35	1	0.03	0.0071	3.916	2.158	2.828	1.069	-4.94766	M1
C	P	M36	1	0.06	0.0075	3.935	2.256	2.811	1.235	-4.89285	M1
C	P	M13	3	0.07	0.0076	3.807	2.193	2.748	1.176	-4.87961	M1
C	P	M8	6	0.11	0.0078	4.23	2.228	2.815	1.235	-4.85363	M1
C	P	M35	2	0.05	0.0081	4.287	2.18	2.877	1.164	-4.81589	M1
C	P	M1	2	0.09	0.0082	3.982	2.206	2.582	1.26	-4.80362	M1
C	P	M42	4	0.03	0.0083	4.245	2.401	2.913	1.251	-4.7915	M1
C	P	M11	2	0.07	0.0089	4.151	2.523	3.042	1.157	-4.7217	M1
C	P	M35	8	0.02	0.009	4.35	2.479	3.084	1.28	-4.71053	M1
C	P	M38	4	0.14	0.0094	4.373	2.307	2.821	1.136	-4.66705	M1
C	P	M44	3	0.03	0.0095	4.518	2.432	3.227	1.301	-4.65646	M1
C	P	M35	6	0.03	0.0096	4.587	2.386	3.163	1.221	-4.64599	M1
C	P	M41	4	0.03	0.0102	4.496	2.494	3.127	1.297	-4.58537	M1
C	P	M40	1	0.08	0.0104	4.623	2.524	3.115	1.251	-4.56595	M1
C	P	M41	5	0.03	0.0104	4.721	2.47	3.023	1.187	-4.56595	M1
C	P	M12	1	0.06	0.0105	4.689	2.487	3.412	1.256	-4.55638	M1
C	P	M44	4	0.04	0.0105	4.579	2.47	3.195	1.26	-4.55638	M1
C	P	M15	2	0.09	0.0109	4.796	2.545	3.263	1.303	-4.51899	M1
C	P	M39	3	0.13	0.011	4.598	2.401	3.137	1.189	-4.50986	M1
C	P	M41	6	0.08	0.011	4.749	2.478	3.224	1.235	-4.50986	M1
C	P	M39	5	0.02	0.0111	4.563	2.57	3.272	1.179	-4.50081	M1
C	P	M42	3	0.07	0.0115	4.937	2.575	3.151	1.255	-4.46541	M1
C	P	M41	3	0.03	0.0116	4.905	2.507	3.081	1.269	-4.45675	M1
C	P	M42	1	0.09	0.0118	4.86	2.746	3.373	1.676	-4.43966	M1
C	P	M38	6	0.04	0.012	4.729	2.557	3.276	1.2	-4.42285	M1
C	P	M43	5	0.11	0.0121	4.668	2.761	3.411	1.339	-4.41455	M1
C	P	M42	5	0.05	0.0124	4.967	2.763	3.503	1.253	-4.39006	M1
C	P	M8	7	0.06	0.0125	5.151	2.657	3.187	1.383	-4.38203	M1
C	P	M38	3	0.08	0.0127	4.802	2.563	3.212	1.426	-4.36615	M1
C	P	M1	5	0.07	0.0128	5.153	2.597	3.225	1.458	-4.35831	M1
C	P	M1	4	0.05	0.0129	4.992	2.668	3.454	1.424	-4.35053	M1
C	P	M15	1	0.15	0.0131	4.842	2.656	3.302	1.411	-4.33514	M1
C	P	M40	6	0.11	0.0132	5.354	2.695	3.54	1.267	-4.32754	M1
C	P	M36	5	0.1	0.0136	5.089	2.66	3.414	1.334	-4.29769	M1
C	P	M40	2	0.09	0.0136	5.01	2.508	3.09	1.19	-4.29769	M1
C	P	M1	3	0.09	0.014	4.86	2.637	3.209	1.383	-4.2687	M1
C	P	M43	4	0.08	0.0142	5.153	2.673	3.581	1.203	-4.25451	M1
C	P	M8	1	0.08	0.0142	5.075	2.624	3.347	1.504	-4.25451	M1
C	P	M8	4	0.11	0.0142	4.867	2.751	3.132	1.401	-4.25451	M1
C	P	M39	2	0.03	0.0143	5.302	2.929	3.765	1.382	-4.2475	M1
C	P	M15	4	0.1	0.0145	5.088	2.668	3.435	1.498	-4.23361	M1
C	P	M14	4	0.06	0.0146	5.458	2.848	3.507	1.415	-4.22673	M1
C	P	M35	7	0.03	0.0147	5.145	2.774	3.654	1.457	-4.21991	M1
C	P	M44	6	0.11	0.0151	5.462	2.857	3.617	1.37	-4.19306	M2
C	P	M35	4	0.06	0.0152	5.152	2.832	3.458	1.451	-4.18646	M2
C	P	M39	4	0.05	0.0161	5.223	2.867	3.552	1.464	-4.12894	M2
C	P	M37	5	0.12	0.0162	5.364	3.007	3.853	1.45	-4.12274	M2
C	P	M43	6	0.15	0.0164	5.128	2.901	3.615	1.285	-4.11047	M2
C	P	M36	2	0.04	0.0174	5.513	2.926	3.669	1.581	-4.05129	M2
C	P	M43	1	0.13	0.0175	5.344	3.065	3.762	1.41	-4.04555	M2
C	P	M14	5	0.09	0.0179	5.437	2.905	3.644	1.722	-4.02295	M2
C	P	M5	2	0.16	0.018	5.17	2.867	3.218	1.735	-4.01738	M2
C	P	M38	1	0.05	0.0186	5.725	2.947	3.646	1.43	-3.98459	M2
C	P	M14	2	0.13	0.0189	5.537	3.005	3.688	1.588	-3.96859	M2
C	P	M11	1	0.09	0.0191	5.537	3.056	3.687	1.611	-3.95807	M2
C	P	M39	1	0.12	0.0191	5.732	3.038	4.053	1.475	-3.95807	M2
C	P	M8	2	0.16	0.0194	5.325	3.012	3.703	1.655	-3.94248	M2
C	P	M37	1	0.04	0.0196	5.417	3.086	3.751	1.705	-3.93223	M2
C	P	M5	3	0.13	0.0196	5.7	3.158	3.981	1.473	-3.93223	M2
C	P	M36	6	0.14	0.0202	5.929	3.017	3.686	1.666	-3.90207	M2
C	P	M12	3	0.09	0.0207	5.744	3.045	3.821	1.57	-3.87762	M2
C	P	M42	6	0.12	0.0207	5.826	3.066	3.99	1.636	-3.87762	M2
C	P	M14	6	0.11	0.0211	5.842	3.124	3.887	1.769	-3.85848	M2
C	P	M44	5	0.2	0.0212	5.662	3.264	3.925	1.563	-3.85375	M2
C	P	M41	1	0.06	0.0213	5.75	3.069	3.751	1.512	-3.84905	M2
C	P	M8	3	0.12	0.0213	6.054	3.195	3.908	1.916	-3.84905	M2
C	P	M44	2	0.08	0.0219	6.065	3.426	4.199	1.553	-3.82127	M2
C	P	M4	5	0.15	0.022	5.628	3.183	3.882	1.598	-3.81671	M2
C	P	M14	3	0.16	0.0221	6.061	3.273	3.966	1.659	-3.81218	M2
C	P	M4	4	0.11	0.0232	6.08	3.311	4.149	1.885	-3.7636	M2
C	P	M43	2	0.21	0.0237	5.994	3.283	4.099	1.441	-3.74228	M2
C	P	M37	2	0.06	0.024	6.394	3.174	4.182	1.499	-3.7297	M2
C	P	M4	1	0.13	0.0242	6.195	3.12	3.999	1.614	-3.7214	M2
C	P	M8	5	0.18	0.025	6.517	3.327	3.979	1.637	-3.68888	M2
C	P	M12	4	0.013	0.0257	6.365	3.11	4.241	1.65	-3.66126	M2
C	P	M4	6	0.15	0.0262	5.795	3.333	3.938	1.557	-3.642	M2
C	P	M36	3	0.06	0.0272	6.39	3.377	4.004	1.636	-3.60454	M2
C	P	M14	1	0.11	0.0281	6.24	3.465	4.18	1.712	-3.57199	M2
C	P	M37	3	0.19	0.0282	6.628	3.387	3.959	1.634	-3.56843	M2
C	P	M37	4	0.21	0.0303	6.812	3.594	4.269	1.661	-3.49661	M2
C	P	M4	2	0.1	0.0305	6.653	3.495	4.383	1.798	-3.49003	M2
C	P	M42	2	0.19	0.0306	6.673	3.584	4.242	1.836	-3.48676	M2
C	P	M44	1	0.23	0.0309	6.738	3.585	4.617	1.785	-3.477	M2
C	P	M5	4	0.14	0.0315	6.457	3.531	4.631	1.953	-3.45777	M2
C	P	M36	4	0.16	0.0325	6.022	3.731	4.125	1.871	-3.42652	M2
C	P	M41	2	0.04	0.0347	7.122	3.958	4.697	2.157	-3.36102	M2
C	P	M5	1	0.1	0.0368	6.831	3.801	4.287	1.84	-3.30226	M2
C	P	M13	1	0.16	0.0395	6.924	3.841	4.664	2.187	-3.23145	M2
C	P	M13	2	0.18	0.046	7.286	4.133	4.92	1.997	-3.07911	M2
P	C	M32	3	0.05	0.0048	3.345	1.919	2.473	0.915	-5.33914	M1
P	C	M17	4	0.06	0.005	3.409	1.938	2.499	0.968	-5.29832	M1
P	C	M22	6	0.03	0.0054	3.804	2.02	2.743	1.096	-5.22136	M1
P	C	M26	7	0.05	0.0054	3.722	1.892	2.469	1.058	-5.22136	M1
P	C	M25	4	0.02	0.0057	3.677	2.065	2.561	1.088	-5.16729	M1
P	C	M16	4	0.03	0.006	3.984	2.051	2.668	0.953	-5.116	M1
P	C	M17	6	0.04	0.006	3.853	2.031	2.747	0.966	-5.116	M1
P	C	M21	3	0.06	0.0062	3.86	2.068	2.572	1.074	-5.08321	M1
P	C	M34	2	0.03	0.0062	3.638	2.056	2.644	1.123	-5.08321	M1
P	C	M34	4	0.06	0.0062	3.996	2.228	2.795	1.122	-5.08321	M1
P	C	M26	3	0.02	0.0072	4.231	2.236	2.824	1.201	-4.93367	M1
P	C	M29	2	0.03	0.0074	3.99	2.189	2.83	1.189	-4.90628	M1
P	C	M20	3	0.04	0.0076	4.134	2.312	2.994	1.046	-4.87961	M1
P	C	M45	6	0.03	0.0077	4.167	2.374	3.06	1.167	-4.86653	M1
P	C	M21	4	0.06	0.0078	4.169	2.206	2.684	1.125	-4.85363	M1
P	C	M26	2	0.02	0.0078	4.056	2.211	2.697	1.163	-4.85363	M1
P	C	M45	1	0.05	0.0078	4.255	2.389	3.13	1.18	-4.85363	M1
P	C	M25	5	0.05	0.0081	4.268	2.351	2.977	1.318	-4.81589	M1
P	C	M33	5	0.02	0.0085	3.992	2.055	2.852	1.081	-4.76769	M1
P	C	M32	4	0.04	0.0086	4.394	2.234	2.834	1.065	-4.75599	M1
P	C	M26	1	0.03	0.0088	4.529	2.33	2.973	1.297	-4.733	M1
P	C	M17	5	0.08	0.009	4.402	2.442	3.004	1.178	-4.71053	M1
P	C	M26	4	0.05	0.0096	4.66	2.307	2.966	1.305	-4.64599	M1
P	C	M26	5	0.05	0.0096	4.376	2.389	3.253	1.33	-4.64599	M1
P	C	M33	4	0.08	0.0096	4.232	2.383	3.092	1.44	-4.64599	M1
P	C	M34	3	0.08	0.0096	4.428	2.458	3.175	1.296	-4.64599	M1
P	C	M29	3	0.03	0.0097	4.493	2.31	2.879	1.34	-4.63563	M1
P	C	M21	2	0.05	0.0098	4.573	2.421	3.12	1.205	-4.62537	M1
P	C	M47	6	0.02	0.0099	4.523	2.642	3.244	1.184	-4.61522	M1
P	C	M22	3	0.05	0.01	4.453	2.55	3.235	1.274	-4.60517	M1
P	C	M22	5	0.05	0.0104	4.51	2.58	3.236	1.418	-4.56595	M1
P	C	M31	5	0.06	0.0105	4.603	2.477	3.167	1.191	-4.55638	M1
P	C	M29	5	0.04	0.0106	4.561	2.429	3.025	1.311	-4.5469	M1
P	C	M31	1	0.06	0.0106	4.739	2.399	3.117	1.283	-4.5469	M1
P	C	M47	4	0.03	0.011	4.592	2.606	3.316	1.22	-4.50986	M1
P	C	M20	6	0.06	0.0111	4.512	2.486	3.3	1.363	-4.50081	M1
P	C	M32	5	0.06	0.0112	4.602	2.474	3.175	1.304	-4.49184	M1
P	C	M45	3	0.04	0.0114	4.857	2.607	3.341	1.455	-4.47414	M1
P	C	M45	7	0.02	0.0115	4.787	2.713	3.421	1.292	-4.46541	M1
P	C	M16	2	0.09	0.0117	4.981	2.557	2.989	1.311	-4.44817	M1
P	C	M29	1	0.04	0.0118	4.866	2.571	3.376	1.425	-4.43966	M1
P	C	M31	2	0.05	0.0119	5.073	2.541	3.302	1.359	-4.43122	M1
P	C	M45	2	0.08	0.0123	4.906	2.724	3.36	1.405	-4.39816	M1
P	C	M34	1	0.05	0.0124	4.757	2.631	3.388	1.424	-4.39006	M1
P	C	M47	2	0.06	0.0141	4.952	2.839	3.512	1.435	-4.26158	M1
P	C	M16	5	0.04	0.0145	5.442	2.912	3.546	1.426	-4.23361	M1
P	C	M23	1	0.07	0.0148	5.193	2.834	3.462	1.567	-4.21313	M1
P	C	M22	4	0.07	0.015	5.391	2.942	3.615	1.637	-4.19971	M2
P	C	M17	2	0.08	0.0153	5.297	2.962	3.599	1.5	-4.1799	M2
P	C	M21	1	0.07	0.0153	5.351	2.849	3.675	1.377	-4.1799	M2
P	C	M32	6	0.08	0.0153	5.198	2.813	3.613	1.55	-4.1799	M2
P	C	M22	2	0.08	0.0156	5.093	2.814	3.57	1.333	-4.16048	M2
P	C	M23	6	0.09	0.0166	5.397	2.946	3.778	1.468	-4.09835	M2
P	C	M16	6	0.06	0.017	5.395	3.013	3.656	1.443	-4.07454	M2
P	C	M19	2	0.06	0.0172	5.212	2.915	3.703	1.618	-4.06285	M2
P	C	M47	3	0.02	0.0172	5.653	2.971	3.681	1.542	-4.06285	M2
P	C	M18	3	0.07	0.0175	5.587	2.976	3.571	1.808	-4.04555	M2
P	C	M20	5	0.08	0.0175	5.699	2.67	3.547	1.494	-4.04555	M2
P	C	M23	2	0.07	0.0175	5.565	2.863	3.59	1.529	-4.04555	M2
P	C	M20	2	0.08	0.0176	5.294	2.933	3.655	1.291	-4.03986	M2
P	C	M34	5	0.09	0.0179	5.228	3.029	3.724	1.523	-4.02295	M2
P	C	M25	6	0.04	0.0181	5.625	3.046	3.979	1.227	-4.01184	M2
P	C	M23	3	0.09	0.0184	5.58	3.069	3.851	1.709	-3.9954	M2
P	C	M19	3	0.08	0.0187	5.417	3.05	3.817	1.617	-3.97923	M2
P	C	M33	2	0.1	0.019	5.305	3.082	3.751	1.626	-3.96332	M2
P	C	M25	3	0.04	0.0191	5.798	2.964	4	1.531	-3.95807	M2
P	C	M20	7	0.11	0.0197	5.948	2.994	4.069	1.675	-3.92714	M2
P	C	M45	5	0.05	0.0198	5.782	3.096	3.684	1.485	-3.92207	M2
P	C	M22	1	0.11	0.0199	5.181	3.033	3.43	1.392	-3.91704	M2
P	C	M46	4	0.04	0.0201	5.46	3.244	3.995	1.749	-3.90704	M2
P	C	M46	2	0.07	0.0202	5.428	3.351	3.719	1.389	-3.90207	M2
P	C	M16	3	0.08	0.0206	5.869	3.221	3.786	1.609	-3.88246	M2
P	C	M33	1	0.14	0.0219	5.68	3.147	3.94	1.709	-3.82127	M2
P	C	M18	1	0.07	0.022	6.395	3.227	4.303	1.617	-3.81671	M2
P	C	M18	6	0.08	0.0222	5.857	3.268	4.25	1.514	-3.80766	M2
P	C	M17	1	0.1	0.0223	6.145	3.535	4.105	1.78	-3.80317	M2
P	C	M45	4	0.09	0.0224	5.871	3.226	4.093	1.452	-3.79869	M2
P	C	M46	6	0.04	0.0227	5.656	3.129	3.792	1.671	-3.78539	M2
P	C	M32	1	0.1	0.0234	6.02	3.141	3.747	1.591	-3.75502	M2
P	C	M18	2	0.11	0.0244	6.293	3.347	4.035	1.957	-3.71317	M2
P	C	M46	3	0.06	0.0252	5.93	3.506	4.421	1.693	-3.68091	M2
P	C	M25	2	0.1	0.0273	6.452	3.317	4.381	1.826	-3.60087	M2
P	C	M18	4	0.1	0.0278	6.626	3.496	4.481	1.845	-3.58272	M2
P	C	M33	3	0.09	0.0291	6.344	3.47	4.19	1.795	-3.53702	M2
P	C	M18	5	0.08	0.0296	6.747	3.721	4.569	2.067	-3.51998	M2
P	C	M16	1	0.12	0.0308	6.524	3.582	4.049	1.605	-3.48024	M2
P	C	M20	1	0.09	0.031	6.611	3.582	4.381	1.947	-3.47377	M2
P	C	M19	1	0.08	0.033	6.698	3.652	4.503	1.837	-3.41125	M2
P	C	M25	1	0.11	0.0333	6.793	3.718	4.764	1.747	-3.4022	M2
P	C	M46	5	0.03	0.0415	7.373	4.229	5.201	2.4	-3.18206	M2
P	P	M21	2		0.0021	2.431	1.43	1.802	0.752	-6.16582	M1
P	P	M16	1	0.03	0.0034	2.984	1.705	2.162	0.782	-5.68398	M1
P	P	M23	6	0.09	0.0034	3.017	1.673	2.133	0.856	-5.68398	M1
P	P	M32	6	0.02	0.004	3.246	1.78	2.365	0.852	-5.52146	M1
P	P	M23	1	0.06	0.0046	3.281	1.899	2.458	0.961	-5.3817	M1
P	P	M45	4	0.15	0.0051	3.537	1.903	2.485	0.916	-5.27851	M1
P	P	M33	2	0.09	0.0054	3.525	1.963	2.58	1.044	-5.22136	M1
P	P	M23	5	0.1	0.0056	3.461	1.965	2.485	0.984	-5.18499	M1
P	P	M32	5	0.05	0.0059	3.63	2.08	2.695	1.048	-5.1328	M1
P	P	M23	4	0.06	0.0061	3.862	2.132	2.744	1.079	-5.09947	M1
P	P	M33	1	0.02	0.0063	3.779	1.966	2.607	0.994	-5.06721	M1
P	P	M19	1	0.04	0.0067	3.676	2.16	2.579	1.148	-5.00565	M1
P	P	M29	3	0.04	0.0073	3.86	2.171	2.878	1.232	-4.91988	M1
P	P	M23	3	0.1	0.0076	3.927	2.169	2.818	1.158	-4.87961	M1
P	P	M31	4	0.05	0.0078	4.162	2.28	2.847	1.052	-4.85363	M1
P	P	M34	5	0.14	0.0079	4.298	2.256	3.037	1.167	-4.84089	M1
P	P	M45	1	0.05	0.008	4.382	2.325	2.835	1.108	-4.82831	M1
P	P	M47	6	0.08	0.0081	4.022	2.179	2.773	0.985	-4.81589	M1
P	P	M17	6	0.06	0.0084	4.189	2.296	3.048	1.277	-4.77952	M1
P	P	M25	2	0.04	0.0086	4.392	2.29	3.022	1.271	-4.75599	M1
P	P	M31	5	0.05	0.0086	4.291	2.281	2.854	1.246	-4.75599	M1
P	P	M33	3	0.09	0.0088	3.995	2.236	2.756	1.186	-4.733	M1
P	P	M34	1	0.09	0.009	4.379	2.413	2.985	1.299	-4.71053	M1
P	P	M34	4	0.11	0.0091	4.315	2.312	2.874	1.163	-4.69948	M1
P	P	M25	6	0.09	0.0094	4.057	2.338	2.751	1.127	-4.66705	M1
P	P	M16	2	0.06	0.0095	4.454	2.339	2.938	1.256	-4.65646	M1
P	P	M47	1	0.17	0.0096	4.581	2.354	3.075	1.109	-4.64599	M1
P	P	M45	5	0.08	0.0099	4.372	2.492	2.997	1.176	-4.61522	M1
P	P	M16	3	0.09	0.01	4.525	2.457	3.101	1.352	-4.60517	M1
P	P	M46	3	0.04	0.01	4.473	2.496	3.128	1.137	-4.60517	M1
P	P	M17	1	0.16	0.0103	4.46	2.438	3.104	1.278	-4.57561	M1
P	P	M25	4	0.11	0.0105	4.263	2.356	2.801	1.172	-4.55638	M1
P	P	M46	5	0.07	0.0105	4.759	2.674	3.124	1.218	-4.55638	M1
P	P	M16	7	0.11	0.0107	4.303	2.407	2.82	1.253	-4.53751	M1
P	P	M31	1	0.1	0.0107	4.633	2.468	2.999	1.329	-4.53751	M1
P	P	M17	4	0.05	0.0108	4.639	2.525	3.066	1.255	-4.52821	M1
P	P	M26	5	0.05	0.0108	4.633	2.492	3.079	1.331	-4.52821	M1
P	P	M31	2	0.1	0.0108	4.776	2.594	3.204	1.327	-4.52821	M1
P	P	M26	6	0.1	0.0112	4.734	2.52	3.198	1.204	-4.49184	M1
P	P	M47	4	0.07	0.0112	4.187	2.648	3.15	1.28	-4.49184	M1
P	P	M22	1	0.1	0.0115	4.57	2.638	3.149	1.216	-4.46541	M1
P	P	M26	1	0.04	0.0115	4.735	2.504	3.141	1.145	-4.46541	M1
P	P	M20	3	0.08	0.0118	4.958	2.746	3.545	1.47	-4.43966	M1
P	P	M25	5	0.1	0.0126	5.11	2.739	3.383	1.326	-4.37406	M1
P	P	M46	2	0.06	0.0126	4.664	2.569	3.117	1.162	-4.37406	M1
P	P	M19	3	0.1	0.0127	5.415	3.112	3.929	1.359	-4.36615	M1
P	P	M47	2	0.09	0.0132	4.91	2.655	3.276	1.248	-4.32754	M1
P	P	M16	5	0.11	0.0135	4.989	2.808	3.297	1.48	-4.30507	M1
P	P	M19	6	0.07	0.0135	4.722	2.7	3.379	1.414	-4.30507	M1
P	P	M20	6	0.09	0.0138	5.267	2.621	3.27	1.294	-4.28309	M1
P	P	M17	5	0.06	0.0139	5.15	2.696	3.396	1.51	-4.27587	M1
P	P	M34	2	0.12	0.0139	5.122	2.773	3.562	1.465	-4.27587	M1
P	P	M19	7	0.1	0.0141	4.716	2.614	3.401	1.575	-4.26158	M1
P	P	M45	6	0.12	0.0141	4.935	2.69	3.35	1.247	-4.26158	M1
P	P	M19	8	0.11	0.0144	4.928	2.608	3.442	1.434	-4.24053	M1
P	P	M17	2	0.07	0.0148	5.19	2.868	3.489	1.226	-4.21313	M1
P	P	M22	3	0.13	0.0149	4.925	2.743	3.266	1.49	-4.20639	M1
P	P	M19	5	0.1	0.0155	5.22	2.748	3.514	1.271	-4.16692	M2
P	P	M34	3	0.13	0.0155	5.166	2.581	3.32	1.353	-4.16692	M2
P	P	M18	2	0.12	0.016	5.62	3.052	3.642	1.372	-4.13517	M2
P	P	M32	1	0.1	0.0162	4.806	2.929	3.473	1.449	-4.12274	M2
P	P	M16	4	0.14	0.0169	5.147	2.856	3.363	1.374	-4.08044	M2
P	P	M26	2	0.12	0.0176	5.592	2.776	3.7	1.495	-4.03986	M2
P	P	M47	5	0.06	0.0176	5.603	3.039	3.687	1.426	-4.03986	M2
P	P	M18	5	0.08	0.0177	5.807	3.019	3.707	1.862	-4.03419	M2
P	P	M33	4	0.07	0.0178	5.674	3.011	3.645	1.557	-4.02856	M2
P	P	M20	2	0.11	0.018	5.459	3.074	3.987	1.504	-4.01738	M2
P	P	M16	6	0.13	0.0182	5.489	2.859	3.38	1.589	-4.00633	M2
P	P	M18	1	0.14	0.0185	5.6	3.024	3.718	1.52	-3.98998	M2
P	P	M21	1	0.12	0.0185	5.725	3.057	3.657	1.49	-3.98998	M2
P	P	M25	1	0.13	0.0188	5.52	3.12	3.704	1.699	-3.9739	M2
P	P	M45	3	0.07	0.0197	5.76	3.249	3.778	1.486	-3.92714	M2
P	P	M46	6	0.1	0.0197	5.551	3.115	3.614	1.472	-3.92714	M2
P	P	M18	3	0.1	0.0198	5.582	3.183	3.878	1.648	-3.92207	M2
P	P	M45	2	0.06	0.0199	5.928	3.161	3.798	1.637	-3.91704	M2
P	P	M47	3	0.09	0.0204	5.806	3.199	3.882	1.531	-3.89222	M2
P	P	M20	4	0.06	0.0214	5.972	3.228	4.001	1.691	-3.84436	M2
P	P	M46	4	0.11	0.0218	5.867	3.302	4.042	1.617	-3.82585	M2
P	P	M32	4	0.12	0.0227	5.734	3.186	3.917	1.555	-3.78539	M2
P	P	M26	4	0.14	0.0237	5.981	3.384	4.083	1.685	-3.74228	M2
P	P	M46	1	0.2	0.0237	6.041	3.127	3.674	1.504	-3.74228	M2
P	P	M20	1	0.13	0.024	5.701	3.466	3.803	1.577	-3.7297	M2
P	P	M29	2	0.16	0.0255	6.091	3.279	4.027	1.724	-3.66908	M2
P	P	M22	2	0.12	0.0276	6.562	3.579	4.469	1.952	-3.58994	M2
P	P	M32	2	0.09	0.0283	6.39	3.344	3.885	1.611	-3.56489	M2
P	P	M25	3	0.13	0.0292	6.665	3.584	4.257	1.642	-3.53359	M2
P	P	M32	3	0.13	0.0351	6.872	3.705	4.474	1.965	-3.34955	M2
P	P	M20	5	0.13	0.0359	6.674	3.764	4.622	1.993	-3.32702	M2
